# Supplementary material
Source: PubMed Central journal article supplement (PMC5395073)
Supplement: supp_WNL.0000000000003837_e-Methods_and_e-Tables.pdf [file supp_WNL.0000000000003837_e-Methods_and_e-Tables.pdf]

## Supplemental Data

### METHODS:

Table e-3: White matter hyperintensities (WMH) were calculated using an automated algorithm designed to segment WMH volume, with manual editing to exclude infarcts and other lesions and standardized to an intracranial volume of 1500 cm<sup>3</sup>. Lacunes were defined by size 3-15mm according to STRIVE reporting standards.<sup>1</sup> For the sensitivity analysis, a higher burden of arteriolosclerosis/small vessel disease was defined by having at least one lacune or a WMH volume of >9400 cm<sup>3</sup>, which represents the cutpoint between the 2<sup>nd</sup> and 3<sup>rd</sup> quintile in the population. Those with no lacunes or a WMH volume ≤ 9400 cm<sup>3</sup> were classified as having a low burden of arteriolosclerosis/small vessel disease.

1. Wardlaw JM, Smith EE, Biessels GJ, et al. Neuroimaging standards for research into small vessel disease and its contribution to ageing and neurodegeneration. *The Lancet Neurology*. 2013;12(8):822-838.

**Table e-1: Neuropsychological Test Battery at Visit 5**

| <b>Test</b>                   | <b>Cognitive Domain</b>                         |
|-------------------------------|-------------------------------------------------|
| Mini Mental Status Exam       | Nonspecific                                     |
| CES Depression                | Depression screen                               |
| Delayed Word Recall*          | Memory                                          |
| Logical Memory 1              | Memory                                          |
| Incidental Learning           | Memory                                          |
| Animal naming                 | Language                                        |
| Boston naming                 | Language                                        |
| Word Fluency*                 | Language                                        |
| Trails A                      | Sustained attention and processing speed (SAPS) |
| Trails B                      | SAPS                                            |
| Digit Symbol Substitution*    | SAPS                                            |
| Digit Span Backwards          | SAPS                                            |
| * Also at visit 2 and visit 4 |                                                 |

**Table e-2. Intracranial atherosclerotic disease (ICAD) and Risk of Cognitive Impairment, prevalent stroke excluded (n=60)**

| RPR (95% CI)                       | MCI               |                   | Dementia          |                    |
|------------------------------------|-------------------|-------------------|-------------------|--------------------|
|                                    | Model 1           | Model 2           | Model 1           | Model 2            |
| Any Plaque                         | 1.12 (0.88, 1.42) | 1.06 (0.83, 1.35) | 1.07 (0.64, 1.77) | 1.01 (0.61, 1.69)  |
| MCA plaque                         | 0.86 (0.55, 1.34) | 0.80 (0.51, 1.26) | 1.44 (0.69, 3.04) | 1.41 (0.66, 3.03)  |
| ACA plaque                         | 1.79 (0.96, 3.31) | 1.82 (0.98, 3.39) | 3.79 (1.53, 9.42) | 4.45 (1.74, 11.43) |
| PCA plaque                         | 1.40 (1.05, 1.94) | 1.39 (0.99, 1.94) | 1.29 (0.66, 2.51) | 1.44 (0.74, 2.79)  |
| Basilar plaque                     | 1.25 (0.83, 1.89) | 1.21 (0.78, 1.86) | 1.31 (0.59, 2.89) | 1.24 (0.55, 2.80)  |
| Vertebral plaque                   | 1.09 (0.74, 1.59) | 1.05 (0.72, 1.54) | 1.79 (0.92, 3.49) | 1.78 (0.92, 3.45)  |
| ICA plaque                         | 0.88 (0.65, 1.18) | 0.83 (0.62, 1.12) | 1.26 (0.71, 2.21) | 1.22 (0.68, 2.19)  |
| Any Stenosis >50%                  | 1.39 (0.94, 2.03) | 1.31 (0.89, 1.90) | 1.81 (0.95, 3.43) | 1.85 (0.95, 3.58)  |
| Number of Plaques                  |                   |                   |                   |                    |
| 0                                  | (ref)             | (ref)             | (ref)             | (ref)              |
| 1-2                                | 1.15 (0.88, 1.50) | 1.07 (0.81, 1.40) | 0.78 (0.41, 1.52) | 0.69 (0.35, 1.35)  |
| >2                                 | 1.07 (0.73, 1.56) | 1.04 (0.71, 1.54) | 1.58 (0.82, 3.03) | 1.68 (0.87, 3.21)  |
| Number of territories with plaque* |                   |                   |                   |                    |
| 0                                  | (ref)             | (ref)             | (ref)             | (ref)              |
| 1-2                                | 1.08 (0.84, 1.39) | 1.02 (0.79, 1.32) | 0.81 (0.44, 1.48) | 0.74 (0.40, 1.36)  |
| >2                                 | 1.33 (0.81, 2.17) | 1.26 (0.76, 2.08) | 2.16 (1.01, 4.61) | 2.23 (1.04, 4.80)  |

RPR= relative prevalence ratio, normal cognition reference group; CI = confidence interval  
 ACA = anterior cerebral artery; MCA = middle cerebral artery; ICAD = intracranial atherosclerotic disease  
 Model 1 is adjusted for socio-demographic factors: age, race-center, sex, education, history of alcohol use and smoking  
 Model 2 is adjusted for model 1 and vascular risk factors: body mass index, systolic blood pressure (per 10mmHg increase), diabetes, low density lipoprotein (per 10 mg/dl increase), APOε4 allele  
 \* Territories include: ACA, MCA, PCA, vertebral, basilar, ICA

**Table e-3. Intracranial Atherosclerotic Disease (ICAD) Characteristics in Participants by Cognitive Status in those with low and higher burden of small vessel disease (SVD)**

|                   | Low Burden SVD (n=640) |           |          |         | SVD (n=1,104) |               |           |         |
|-------------------|------------------------|-----------|----------|---------|---------------|---------------|-----------|---------|
|                   | Normal                 | MCI       | Dementia | p-value | Normal        | MCI           | Dementia  | p-value |
| Any Plaque        | 129<br>(29.5)          | 58 (30.9) | 5 (35.7) | 0.841   | 242 (38.9)    | 170<br>(41.2) | 31 (44.9) | 0.540   |
| MCA plaque        | 24 (5.5)               | 8 (4.3)   | 2 (14.3) | 0.261   | 63 (10.1)     | 39 (9.4)      | 10 (14.5) | 0.437   |
| ACA plaque        | 5 (1.1)                | 3 (1.6)   | 2 (14.3) | <0.001  | 27 (4.3)      | 25 (6.1)      | 7 (10.1)  | 0.091   |
| Vertebral plaque  | 36 (8.2)               | 14 (17.5) | 2 (14.3) | 0.659   | 77 (12.4)     | 63 (15.3)     | 13 (18.8) | 0.197   |
| ICA plaque        | 78 (17.8)              | 32 (17.0) | 2 (14.3) | 0.924   | 128 (20.6)    | 76 (18.4)     | 20 (29.0) | 0.124   |
| Any Stenosis >50% | 32 (7.3)               | 12 (6.4)  | 3 (21.4) | 0.114   | 68 (10.9)     | 62 (15.0)     | 12 (17.4) | 0.081   |
| Any Stenosis >70% | 14 (3.2)               | 4 (2.1)   | 3 (21.4) | <0.001  | 36 (5.8)      | 31 (7.5)      | 8 (11.6)  | 0.147   |

Values are N (%) unless otherwise stated. Small vessel disease was defined by having at least 1 lacune or a white matter hyperintensity volume of >9400 cm<sup>3</sup>, which represents the cutpoint between the 2<sup>nd</sup> and 3<sup>rd</sup> quintile for the population. Posterior cerebral and basilar artery not shown above as there was ≤1 participant with plaque, WMH <9400 and dementia. ACA = anterior cerebral artery; MCA = middle cerebral artery; ICA = internal carotid artery

**Table e-4: Distribution of Plaques by Territory**

| <b>Plaque territory</b> | <b>Participants with plaque in territory (n, %)</b> | <b>Participants with plaque in territory and at least one other territory (n, %)*</b> | <b>Number of other territories with at least one plaque (mean, SD)</b> | <b>Number of plaques per territory (mean, SD)</b> | <b>Number of plaques in other territories (mean, SD)</b> |
|-------------------------|-----------------------------------------------------|---------------------------------------------------------------------------------------|------------------------------------------------------------------------|---------------------------------------------------|----------------------------------------------------------|
| MCA                     | 146 (8.4)                                           | 121 (82.9)                                                                            | 2.0 (1.5)                                                              | 1.8 (1.3)                                         | 4.3 (3.4)                                                |
| ACA                     | 69 (4.0)                                            | 57 (82.6)                                                                             | 2.5 (1.7)                                                              | 1.3 (0.88)                                        | 6.2 (4.5)                                                |
| PCA                     | 239 (13.7)                                          | 170 (71.1)                                                                            | 1.6 (1.5)                                                              | 1.7 (1.0)                                         | 3.7 (3.4)                                                |
| Basilar                 | 167 (9.6)                                           | 135 (80.8)                                                                            | 1.8 (1.5)                                                              | 1.4 (0.74)                                        | 4.0 (3.8)                                                |
| Vertebral               | 205 (11.8)                                          | 148 (72.2)                                                                            | 1.5 (1.5)                                                              | 1.2 (0.54)                                        | 3.8 (3.9)                                                |
| ICA                     | 336 (19.3)                                          | 187 (55.7)                                                                            | 1.1 (1.4)                                                              | 1.4 (0.85)                                        | 3.3 (3.3)                                                |

ACA = anterior cerebral artery; MCA = middle cerebral artery; PCA = posterior cerebral artery; ICA = internal carotid artery; SD = standard deviation

\*Percentage is of participants with plaque in territory in left column
